# Supplementary material
Source: PubMed Central journal article supplement (PMC3910640)
Supplement: 1318445111_pnas.201318445SI.pdf [file 1318445111_pnas.201318445SI.pdf]

# Supporting Information

Luhur et al. 10.1073/pnas.1318445111

## SI Materials and Methods

**Drosophila Strains.** Strains used include the following: (i)  $y^1 w^*$   $P\{y^+, w^{ORF}::br^3UTR\}$ ;  $P\{ry[+t7.2] = neoFRT\}40A$ ;  $P\{ry[+t7.2] = ey-FLP.N\}6$ , (ii)  $y^1 w^*$   $P\{y^+, w^{ORF}::br^3UTR\}$ ;  $P\{ry[+t7.2] = neoFRT\}42D$   $Mi\{ET1\}emp[MB02756]$ ;  $P\{ry[+t7.2] = ey-FLP.N\}6$ , (iii)  $y^1 w^*$   $P\{y^+, w^{ORF}::br^3UTR\}$ ;  $P\{ry[+t7.2] = ey-FLP.N\}5$ ;  $P\{neoFRT\}82B$ , (iv)  $y^1 w^*$   $P\{y^+, w^{ORF}::w^3UTR+6Xlet-7AS\}$ , (v)  $y^1 w^*$   $P\{y^+, w^{ORF}::w^3UTR+6XmiR-125AS\}$ , (vi)  $y^1 w^*$   $P\{y^+, w^{ORF}::w^3UTR+6XmiR-100AS\}$ , (vii)  $let-7-C^{KO1w-}$   $P\{ry[+t7.2] = neoFRT\}40A$ , (viii)  $P\{neoFRT\}82B$   $dcr-1^{Q1147X}$  (gift from R. Carthew), (ix)  $P\{neoFRT\}82B$   $pasha^{KO}$  (gift from E. Lai, Memorial Sloan-Kettering Cancer Center, New York), (x)  $P\{ry[+t7.2] = neoFRT\}42D$   $droscha^{R662X}$  (gift from E. Lai), (xi)  $P\{ry[+t7.2] = neoFRT\}42D$   $droscha^{W884X}$  (gift from R. Carthew, Northwestern University, Evanston, IL), (xii)  $P\{ry[+t7.2] = neoFRT\}42D$   $droscha^{R1113X}$ , (xiii)  $P\{ry[+t7.2] = neoFRT\}42D$   $droscha^{\Delta, E859K}$ , (xiv)  $P\{neoFRT\}42D$   $P\{Ubi-GFP(S65T)nls\}2R$  (BL 5626), (xv)  $attP2 > pBDPDroscha$  (gift from E. Lai), (xvi)  $P\{hsFLP\}22$ ,  $y1 w^*$   $P\{UAS-mCD8::GFP.L\}Ptp4ELL4$ ;  $P\{ry[+t7.2] = neoFRT\}42D$   $P\{w[+mC] = tubP-GAL80\}LL2$ ;  $P\{w[+mW.hs] = GawB\}ey[OK107]$ , (xvii)  $P\{hsFLP\}22$ ,  $y1 w^*$   $P\{UAS-mCD8::GFP.L\}Ptp4ELL4$ ;  $P\{ry[+t7.2] = neoFRT\}82B$   $P\{w[+mC] = tubP-GAL80\}LL3$ ;  $P\{w[+mW.hs] = GawB\}ey[OK107]$ , (xviii)  $y1 w^*$   $P\{UAS-mCD8::GFP.L\}Ptp4ELL4$ ,  $P\{GawB\}acj6PG63$ ;  $P\{ry[+t7.2] = neoFRT\}42D$   $P\{w[+mC] = tubP-GAL80\}LL2$ , (xix)  $PBac\{GH146-GAL4.B\}$ ;  $P\{ry[+t7.2] = neoFRT\}42D$   $P\{w[+mC] = tubP-GAL80\}LL2$ ;  $P\{UAS-mCD8::GFP.L\}LL6$ , (xx)  $P\{ry[+t7.2] = hsFLP\}122$ ;  $P\{GawB\}GH146$   $P\{UAS-mCD8::GFP.L\}LL5$ ;  $P\{ry[+t7.2] = neoFRT\}82B$   $P\{w[+mC] = tubP-GAL80\}LL3$ , (xxi)  $Df(2R)Exel6055$ ,  $P\{w[+mC] = XP-U\}Exel6055/CyO$  (BL7537), and (xxii)  $P\{ry[+t7.2] = neoFRT\}42D$   $P\{w[+mC] = Ubi-GFP(S65T)nls\}2R$  (BL5626). The  $let-7-C^{KO1w-}$  allele is a  $white^-$  version of  $let-7-C^{KO1}$  that was generated by ethylmethylsulfonate (EMS) mutagenesis. P-element containing  $UAS-Droscha$  transgenes were injected by Rainbow Transgenic Services. Insertions were mapped by standard methods, and at least two different insertions were analyzed for phenotypes.

**Eye and Central Nervous System Clones.** To generate eye clones, virgins containing eyFLP and either a WT or mutation-bearing  $FRT^{42D}$  chromosome were crossed to males containing an  $FRT^{42D}$  Ubi-GFP chromosome. Resulting progeny were dissected as third-instar larvae. To generate mosaic analysis with a repressible cell marker (MARCM) clones in mushroom bodies (MBs),  $P\{hsFLP\}22$ ,  $y1 w^*$   $P\{UAS-mCD8::GFP.L\}Ptp4ELL4$ ;  $P\{ry[+t7.2] = neoFRT\}42D$   $P\{w[+mC] = tubP-GAL80\}LL2$ ;  $P\{w[+mW.hs] = GawB\}ey[OK107]$  or  $P\{hsFLP\}22$ ,  $y1 w^*$   $P\{UAS-mCD8::GFP.L\}Ptp4ELL4$ ;  $P\{ry[+t7.2] = neoFRT\}82B$   $P\{w[+mC] = tubP-GAL80\}LL3$ ;  $P\{w[+mW.hs] = GawB\}ey[OK107]$  virgins were crossed to flies carrying mutation-bearing  $FRT^{42D}$  or  $FRT^{82B}$  chromosomes. To generate MARCM clones in anterodorsal projection neurons (adPNs),  $y1 w^*$   $P\{UAS-mCD8::GFP.L\}Ptp4ELL4$ ,  $P\{GawB\}acj6PG63$ ;  $P\{ry[+t7.2] = neoFRT\}42D$   $P\{w[+mC] = tubP-GAL80\}LL2$  or  $PBac\{GH146-GAL4.B\}$ ;  $P\{ry[+t7.2] = neoFRT\}42D$   $P\{w[+mC] = tubP-GAL80\}LL2$ ;  $P\{UAS-mCD8::GFP.L\}LL6$  virgins were crossed to flies carrying mutation-bearing  $FRT^{42D}$  chromosomes. Flies were allowed to lay eggs for 6 h and were transferred to new vials. Embryos were then aged for 18–20 h. Newly hatched larvae between 18 and 26 h after egg laying were heatshocked at 38 °C for 1 h to mark MB and adPN neuroblast clones. Single cell MARCM clones in the adPN lineage were generated using a similar method with a 30-min heat shock.

**Mutagenesis Screen.** Isogenized  $FRT^{42D}$  males were fed 25 mM EMS and crossed to  $let-7-C$  sensor virgins of the genotype  $y^1 w^*$   $P\{y^+, w^{ORF}::br^3UTR\}$ ;  $FRT^{42D}$   $Mi\{ET1, GFP\}emp$ ;  $eyFLP^6$ . Male progeny that displayed eye color mosaicism were backcrossed to the sensor strain, and any of their male progeny that continued to display eye color mosaicism were used to generate balanced GFP negative stocks.

**Plasmids.** *Drosophila melanogaster* Drosha and Pasha cDNAs were PCR amplified from LD20030 and LD23072 plasmids available from the *Drosophila* Genomic Resource Center. The PCR products were cloned into pENTR/d-TOPO (Invitrogen). Plasmids expressing C-terminal Flag, HA or Myc-tagged versions of Drosha were generated by recombining pENTR-Drosha with pAWF, pAWH, or pAWM Gateway plasmids (T. Murphy, Carnegie Institute for Science, Baltimore; obtained from *Drosophila* Genomic Resource Center, Bloomington, IN), respectively, in an LR Clonase enzyme (Invitrogen) reaction. Plasmids expressing N-terminal Flag or HA-tagged Pasha were similarly generated by recombining pENTR-Pasha with pAFW or pAHW (T. Murphy; obtained from *Drosophila* Genomic Resource Center, Bloomington, IN), respectively. Plasmids expressing C-terminal Flag tagged Drosha containing E859K,  $\Delta$ , E859K $\Delta$ , or dominant negative (DN) mutations were generated by mutating pENTR-Drosha using the QuikChange Lightning Multi Mutagenesis Kit (Agilent Technologies) and then recombining the mutant version into pAWF. The DN version of Drosha contains two point mutations (E912Q and E1087Q) that are orthologous to the transdominant Drosha mutations described in Heo et al. (1).

**Transgenes.**  $P\{w^{ORF}\}$  reporters. The  $pP\{w^{ORF}::w^{UTR+BXG}\}$  vector, shown in Fig. S2, was derived from the  $pP\{SUPor-P\}$  vector, a gift from P. Geyer (University of Iowa, Iowa City, IA) by inserting a BamHI, XbaI and BglII polycloning site between the *white* ORF and the *white* 3'UTR.  $pP\{w^{ORF}::w^{UTR+6xlet-7as}\}$ ,  $pP\{w^{ORF}::w^{UTR+6xmiR-100as}\}$ ,  $pP\{w^{ORF}::w^{UTR+6xmiR-125as}\}$  contain six repeats of perfectly complementary sequence to either *let-7*, *miR-100*, or *miR-125* inserted into the XbaI of  $pP\{w^{ORF}::w^{UTR+BXG}\}$ , respectively.  $pP\{w^{ORF}::br^3UTR\}$  was generated by ligating an error-free PCR amplified version of the *broad-Z3* 3'UTR into the NotI and XbaI sites of  $pP\{w^{ORF}::MCS\}$ .

UAS transgenes expressing C-terminal Flag-tagged WT Drosha or Drosha containing E859K,  $\Delta$ , E859K $\Delta$ , or DN mutations were generated by recombining WT or mutant pENTR-Drosha into pTWF (*Drosophila* Genomic Resource Center, Bloomington, IN).

**Northern Blot Analysis.** Total RNA was extracted from staged WT and mutant larvae using Tri Reagent (Molecular Research Center). Radioactive Northern blot analysis was performed as previously described. The radioactive signal was detected with an Amersham Bioscience Typhoon 9210 (Physical Biochemistry Instrumentation Facility, Indiana University).

**Expression and Affinity Purification of Recombinant Drosha Proteins.** Expression plasmids for Flag-Drosha and Flag-Pasha were cotransfected into BG3-c2 cells with Effectene transfection reagent (Qiagen). Cells were plated onto 10-cm dishes at a density of  $1 \times 10^6$  cells/mL, transfected with 6  $\mu$ g Flag Drosha and 4  $\mu$ g of Flag Pasha plasmid DNA along with 50  $\mu$ L Effectene per dish, and harvested after 72 h. Complexes were purified from cell lysates with anti-Flag M2 affinity gel (Sigma) as described previously (2). The affinity column was eluted with 400  $\mu$ g/mL of 3 $\times$







**Fig. S5.** *OK107-Gal4, UAS-mCD8::GFP*-labeled *drosha*<sup>ΔE859K</sup> (A) and *pasha*<sup>KO</sup> (B) adult MB neuroblast clones generated in newly hatched larvae and stained with anti-FasII antibodies. Panels A and B are uncropped versions of the panels in Fig. 2 that highlight the neuronal overextension. *OK107-Gal4, UAS-mCD8::GFP*-labeled WT (C) and *drosha*<sup>R1113X</sup> (D) adult MB neuroblast clones generated in newly hatched larvae clones. Panels C and D are representative examples of the cell body images used for cell number quantification shown in Fig. 2H. *OK107-Gal4, UAS-mCD8::GFP*-labeled WT (E) and *dcr-1*<sup>Q1147X</sup> (F) larval MB clones generated in newly hatched larvae and stained with anti-Dpn (red) and anti-Dac (blue) antibodies. This NB displays characteristic features, including large size, weak GFP expression, presence of NB marker Deadpan (Dpn), and absence of differentiated MB neuron marker, Dachshund (Dac). Note that a cell displaying these characteristics is not found in F. (Scale bar for A–F, 10 μm.) (G) Number of neuroblasts in larval MB clones of indicated genotypes. Error bars are not shown, because all WT and mutant clones contained one and zero neuroblasts, respectively. Numbers in parentheses indicate number of clones analyzed.





**Fig. S8.** The structure of MBs and antennal lobes from *drosha*<sup>ΔE859K</sup> heterozygote animals are comparably normal. Entire MB structure labeled with *OK107-GAL4*, *UAS-mCD8GFP* from (A) WT and (B) *drosha*<sup>ΔE859K</sup> heterozygotes. The antennal lobe structure of (C) WT and (D) *drosha*<sup>ΔE859K</sup> heterozygotes, labeled with *GH146-GAL4*, *UAS-mCD8GFP*. (Scale bar, 10 μm.)
